# Supplementary material
Source: PubMed Central journal article supplement (PMC3982754)

Supplemental Table S2 :Quantitative real-time PCR (qPCR) validation of selected genes in central and lateral pedicels of X3177 corymbs at four time points. Ratio of expression are reported for each gene. Ratios were calculated on the basis of normalized intensities for microarray analyses (log ratio), and as normalized expression for qPCR (Ct). At the bottom of the table, correlation between qPCR ratios and microarray log ratios is shown for the same genes, along with Spearman correlation coefficient. DAP : days after pollination.

| Stage  | MDP number    | Gene annotation | qPCR (Ct ratio) | microarray (log ratio) |
|--------|---------------|-----------------|-----------------|------------------------|
| E2     | MDP0000005879 | ATHB8           | -0.08           | 0.1                    |
| E2     | MDP0000284421 | ADL1            | -0.91           | -0.26                  |
| E2     | MDP0000256199 | AT CKX6         | -1.3            | -1.28                  |
| E2     | MDP0000889955 | AMP1            | -0.41           | -0.62                  |
| E2     | MDP0000509768 | ARR9            | -0.27           | -0.57                  |
| E2     | MDP0000209143 | AT GOLS4        | -1.72           | -1.07                  |
| E2     | MDP0000872262 | SUS 4           | -1.16           | -0.63                  |
| E2     | MDP0000615948 | ATHB-7          | -1.47           | -0.89                  |
| F1     | MDP0000005879 | ATHB8           | 0.77            | 0.67                   |
| F1     | MDP0000284421 | ADL1            | -0.56           | -0.43                  |
| F1     | MDP0000256199 | AT CKX6         | -2.29           | -2.41                  |
| F1     | MDP0000889955 | AMP1            | -1.86           | -2.14                  |
| F1     | MDP0000509768 | ARR9            | -0.51           | -0.99                  |
| F1     | MDP0000209143 | AT GOLS4        | -2.97           | -2.17                  |
| F1     | MDP0000872262 | SUS 4           | -0.2            | -1.07                  |
| F1     | MDP0000615948 | ATHB-7          | -2.93           | -1.97                  |
| 6 DAP  | MDP0000005879 | ATHB8           | -1.75           | -0.73                  |
| 6 DAP  | MDP0000838851 | ATHB15          | -0.29           | -0.5                   |
| 6 DAP  | MDP0000478260 | TT10            | -1.34           | -0.95                  |
| 6 DAP  | MDP0000134838 | TRN2            | -0.51           | -0.75                  |
| 6 DAP  | MDP0000136180 | VND1            | 1.39            | 0.69                   |
| 6 DAP  | MDP0000284421 | ADL1            | -0.95           | -1.08                  |
| 6 DAP  | MDP0000256199 | AT CKX6         | 2.01            | 0.05                   |
| 6 DAP  | MDP0000889955 | AMP1            | 1.38            | -0.05                  |
| 6 DAP  | MDP0000209143 | AT GOLS4        | 1.92            | 0.38                   |
| 12 DAP | MDP0000005879 | ATHB8           | -0.17           | -0.47                  |
| 12 DAP | MDP0000838851 | ATHB15          | -0.53           | -0.08                  |
| 12 DAP | MDP0000478260 | TT10            | -0.85           | -0.58                  |
| 12 DAP | MDP0000134838 | TRN2            | -0.16           | -0.51                  |
| 12 DAP | MDP0000136180 | VND1            | 0.38            | 0.81                   |
| 12 DAP | MDP0000284421 | ADL1            | -1.41           | -0.65                  |
| 12 DAP | MDP0000256199 | AT CKX6         | 0.04            | 0.21                   |
| 12 DAP | MDP0000889955 | AMP1            | -0.11           | -0.24                  |
| 12 DAP | MDP0000209143 | AT GOLS4        | -1.14           | 0.1                    |

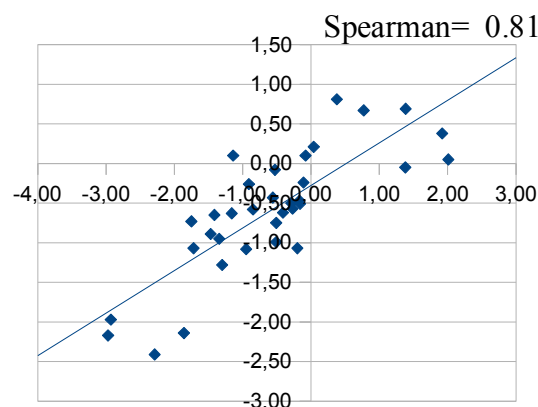

Supplement: supp_pp.114.236117_236117Supp_table_S2.pdf [file supp_pp.114.236117_236117Supp_table_S2.pdf]
