# Supplementary material
Source: PubMed Central journal article supplement (PMC3982754)
Supplement: supp_pp.114.236117_236117Supp_figure_S1_S2_S3.pdf [file supp_pp.114.236117_236117Supp_figure_S1_S2_S3.pdf]

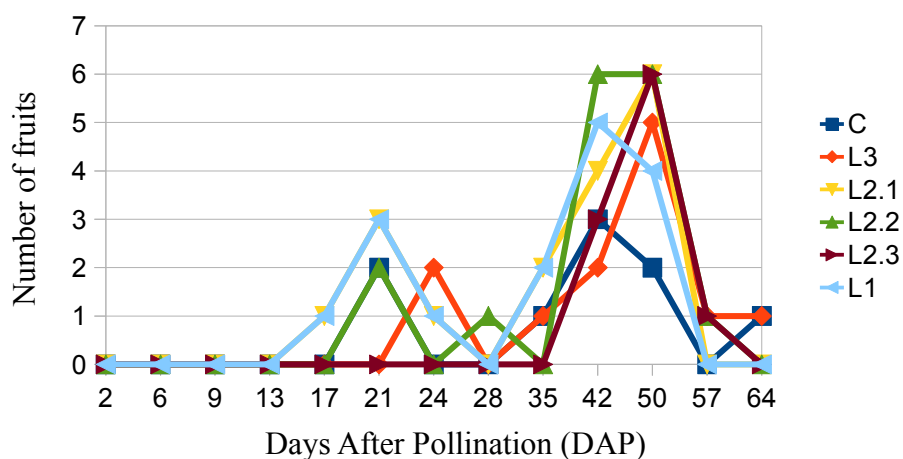

Supplemental Figure S1. X3177 fruit drop kinetic according to their position on the corymbs. Fruits from 30 selected corymbs were all hand pollinated on the same day at stage F1, and classified depending on their respective position on the corymb (C, central fruitlet ; L1, small lateral fruitlet ; L2, medium lateral fruitlet ; L3, big lateral fruitlet).

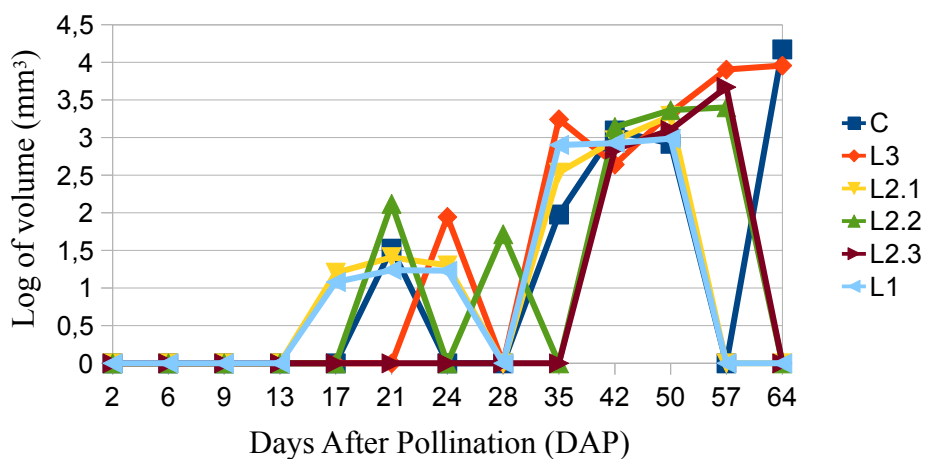

Supplemental Figure S2. X3177 fruit volume (log transformed from mm<sup>3</sup>) before shedding. Fruits from 30 selected corymbs were all hand pollinated on the same day at stage F1, and classified depending on their respective position on the corymb (C, central fruitlet ; L1, small lateral fruitlet ; L2, medium lateral fruitlet ; L3, big lateral fruitlet).

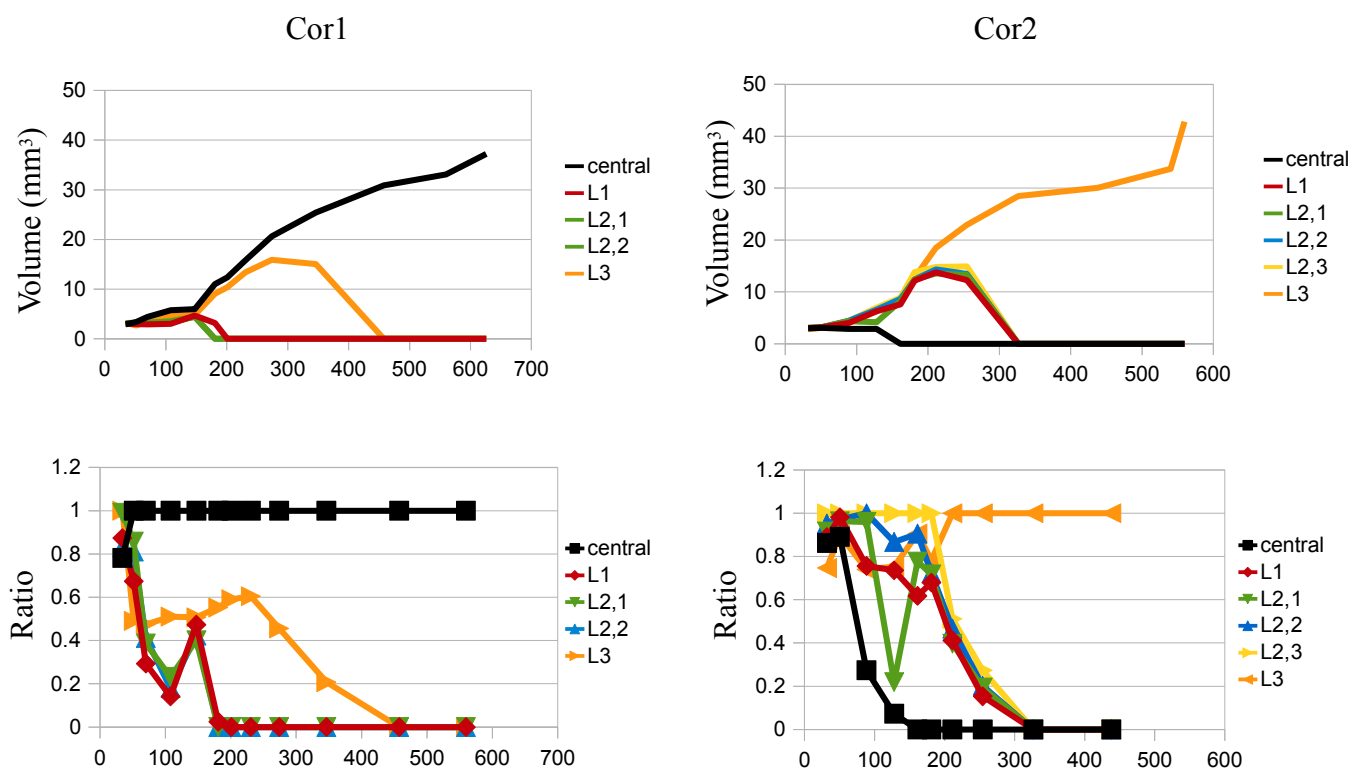

Supplemental Figure S3. (A) and (B) : Dynamic of X3177 fruit volume from 0 to 600 °d for two representative corymbs (Cor1 and Cor2). Fruits from these selected corymbs were all hand pollinated on the same day at stage F1, and classified depending on their respective position on the corymb (central fruitlet ; L1, small lateral fruitlet ; L2, medium lateral fruitlet ; L3, big lateral fruitlet). Cor1 is representative of corymbs retaining only the central fruit, while Cor2 is representative of corymbs retaining only the L3 fruit. (C) and (D) : Ratios of fruit volumes calculated on the basis of the biggest fruit in the corymb. (C) represents the ratios of fruit volume from Cor1, (D) represents the ratios of fruit volume from Cor2.
